# Supplementary material for: Synthesis, application and kinetic modeling of CeOx–Si–CoMo catalysts for the hydrodesulfurization of dibenzothiophene
Source: Royal Society of Chemistry journal article supplement (doi:10.1039/c8re00330k), 2019-01-01
Supplement: c8re00330k1.pdf [file c8re00330k1.pdf]

**Synthesis, application and kinetic modeling of CeO<sub>x</sub>-Si-CoMo catalysts for  
hydrodesulfurization of dibenzothiophene**

Abdulkadir Tanimu<sup>a</sup>, Saheed A. Ganiyu<sup>a,b</sup>, Sagir Adamu<sup>c</sup> Khalid Alhooshani<sup>a\*</sup>

<sup>a</sup>Department of Chemistry, King Fahd University of Petroleum and Minerals, Dhahran  
31261, Saudi Arabia.

<sup>b</sup>Center of Excellence in Nanotechnology, King Fahd University of Petroleum and Minerals,  
Dhahran 31261, Saudi Arabia.

<sup>c</sup>Department of Chemical Engineering, King Fahd University of Petroleum and Minerals,  
Dhahran 31261, Saudi Arabia.

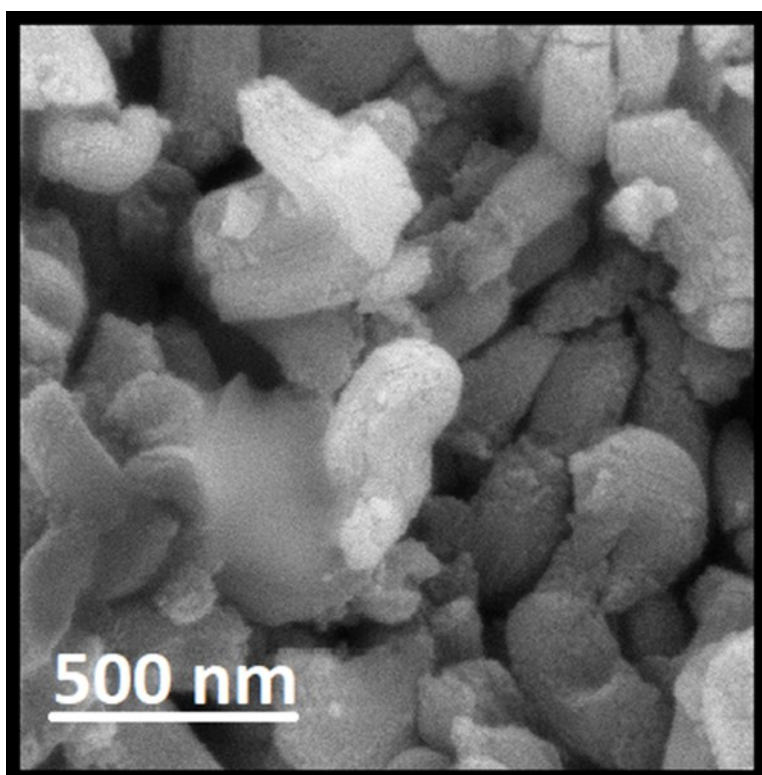

Fig. SI-1: FESEM image for Si-CoMo sulfided catalyst.

**Table S1:** Different types of Mo phases in the catalysts

| Catalysts                         | Percent molybdenum in various oxidation states |                                       |                                       |
|-----------------------------------|------------------------------------------------|---------------------------------------|---------------------------------------|
|                                   | Mo <sup>4+</sup> (3d <sub>5/2</sub> )          | Mo <sup>6+</sup> (3d <sub>5/2</sub> ) | Mo <sup>6+</sup> (3d <sub>3/2</sub> ) |
| <b>Binding energy</b>             | <b>229.5 eV</b>                                | <b>231.8 eV</b>                       | <b>235.6 eV</b>                       |
| <b>Si-CoMo</b>                    | 11.51                                          | 58.24                                 | 30.25                                 |
| <b>1CeO<sub>x</sub>-Si-CoMo</b>   | 20.86                                          | 30.16                                 | 48.98                                 |
| <b>2.5CeO<sub>x</sub>-Si-CoMo</b> | 33.44                                          | 44.59                                 | 21.97                                 |
| <b>5CeO<sub>x</sub>-Si-CoMo</b>   | -                                              | 40.92                                 | 59.08                                 |
| <b>10CeO<sub>x</sub>-Si-CoMo</b>  | -                                              | 44.16                                 | 55.84                                 |

**Table S2:** Effect of process temperature for 2.5CeO<sub>x</sub>-Si-CoMo (5 MPa; DBT=1000 ppm; reaction time = 4 h).

| Temperature (°C) | Percent sulfur removal (%) at different temperature |       |       |       |
|------------------|-----------------------------------------------------|-------|-------|-------|
|                  | 1h                                                  | 2h    | 3h    | 4h    |
| <b>325</b>       | 64.58                                               | 75.01 | 87.23 | 95.46 |

|            |       |       |      |       |
|------------|-------|-------|------|-------|
| <b>350</b> | 73.54 | 90.42 | 94.6 | 98.14 |
| <b>375</b> | 99.27 | 100   | 100  | 100   |

**Table S3:** Catalyst performance results: Product distribution (%) after 1h for 2.5CeO<sub>x</sub>-Si-CoMo at varying temperatures (Process conditions: 5 MPa; DBT=1000 ppm).

| <b>Temp (°C)</b> | <b>Product distribution (%)</b> |            |           |              |               |
|------------------|---------------------------------|------------|-----------|--------------|---------------|
|                  | <b>CPB</b>                      | <b>CHB</b> | <b>BP</b> | <b>THDBT</b> | <b>BP/CHB</b> |
| <b>325</b>       |                                 | 14.46      | 85.54     | -            | 5.92          |
| <b>350</b>       | -                               | 15.53      | 84.47     | -            | 5.44          |
| <b>375</b>       | -                               | 16.05      | 83.95     | -            | 5.23          |

**Table S4:** Effect of temperature on first-order rate constants for HDS of DBT (catalyst = 2.5CeO<sub>x</sub>-Si-CoMo).

| <b>Temperature (°C)</b> | <b>k<sub>HDS</sub> × 10<sup>3</sup> (min<sup>-1</sup>)</b> | <b>k<sub>DDS</sub> × 10<sup>3</sup> (min<sup>-1</sup>)</b> | <b>k<sub>HYD</sub> × 10<sup>3</sup> (min<sup>-1</sup>)</b> | <b>k<sub>DDS</sub>/k<sub>HYD</sub></b> |
|-------------------------|------------------------------------------------------------|------------------------------------------------------------|------------------------------------------------------------|----------------------------------------|
| <b>325</b>              | 17.30                                                      | 14.80                                                      | 2.50                                                       | 5.92                                   |
| <b>350</b>              | 22.16                                                      | 18.72                                                      | 3.44                                                       | 5.44                                   |
| <b>375</b>              | 82.00                                                      | 68.64                                                      | 13.16                                                      | 5.22                                   |
